# Supplementary material for: Genetic and Phenotypic Spectrum of KBG Syndrome: A Report of 13 New Chinese Cases and a Review of the Literature
Source: MDPI journal article supplement (doi:10.3390/jpm12030407), 2022-03-05
Supplement: s1 [file s1]

**Table S2.** Clinical and genetic analysis of 13 cases with missense variations

| Patient                                      | P1                             | P2                              | P3                          | P4                    | P5                          | P6                      | P7<br>(P6'<br>mother)   | P8                      | P9<br>(P8'<br>father)   | P10                    | P11                         | P12                             | P13                     |
|----------------------------------------------|--------------------------------|---------------------------------|-----------------------------|-----------------------|-----------------------------|-------------------------|-------------------------|-------------------------|-------------------------|------------------------|-----------------------------|---------------------------------|-------------------------|
| <b>Reference</b>                             | This study                     | This study                      | This study                  | Xu, M [14]            | Walz, K.<br>[5]             | Miyatake,<br>S. [28]    |                         | Murray,<br>N. [29]      |                         | Kang, Y.<br>[38]       | Scarano, E.<br>[40]         | Guevara–<br>Aguirre, J.<br>[45] | Zhang, T.<br>[50]       |
| <b>Gender</b>                                | Male                           | Female                          | Male                        | Male                  | Male                        | Male                    | Female                  | Female                  | Male                    | Male                   | Male                        | Female                          | Male                    |
| <b>Age</b>                                   | 12y                            | 3y6m                            | 4y8m                        | 20y                   | 13y                         | 7y                      | 30y                     | 6y                      | 33y                     | 14y                    | Na                          | 5.7y                            | 9y                      |
| <b>Variant</b>                               | c.5519C>T<br>(p.A1840V<br>)    | c.7832A><br>T<br>(p.H2611L<br>) | c.6122T><br>G(<br>p.V2041G) | c.362T>A<br>(p.M121K) | c.7535G>A<br>(p.R2512Q<br>) | c.6416C>T<br>(p.P2139L) | c.6416C>T<br>(p.P2139L) | c.3442G>A<br>(p.G1148S) | c.3442G>A<br>(p.G1148S) | c.2579C>T<br>(p.S860L) | c.7534C>T<br>(p.R2512W<br>) | c.5786G>A<br>(p.S1929N)         | c.6427C>G<br>(p.L2143V) |
| <b>Variation source</b>                      | Mother                         | De novo                         | Father                      | De novo               | De novo                     | Mother                  | NA                      | Father                  | NA                      | Mother                 | De novo                     | NA                              | Mother                  |
| <b>GnomAD MAF</b>                            | 0.00002                        | 0                               | 0                           | 0                     | 0                           | 0.00005                 | 0.00005                 | 0.00003                 | 0.00003                 | 0.00004                | 0                           | 0.000004                        | 0.000004                |
| <b>Function predction</b>                    | Provean                        |                                 |                             |                       |                             |                         |                         |                         |                         |                        |                             |                                 |                         |
|                                              | N(−0.938)                      | D(−8.491)                       | N(−1.307)                   | D(−4.715)             | D(−3.298)                   | D(−3.769)               | D(−3.769)               | N(−0.487)               | N(−0.487)               | N(−1.540)              | D(−6.596)                   | N(−0.590)                       | N (−0.473<br>)          |
|                                              | PolyPhen2 (HumDiv)             | B(0.001)                        | PD (0.999)                  | B(0.007)              | PD(0.892)                   | PD(1.000)               | PD(1.000)               | B(0.001)                | B(0.001)                | PD(0.996)              | PD(1.000)                   | B(0.002)                        | PD                      |
|                                              | MutationTaster                 | P                               | DC                          | P                     | DC                          | DC                      | DC                      | P                       | P                       | DC                     | DC                          | P                               | P                       |
| <b>Craniofacial anomalies</b>                | +                              | +                               | +                           | +                     | +                           | +                       | +                       | +                       | +                       | Na                     | +                           | +                               | +                       |
| <b>Dental anomalies</b>                      | +                              | +                               | +                           | +/-                   | +                           | +                       | +                       | Na                      | +                       | Na                     | +                           | Na                              | –                       |
| <b>Skeletal anomalies</b>                    |                                |                                 |                             |                       |                             |                         |                         |                         |                         |                        |                             |                                 |                         |
| Hand/foot anomalies                          | –                              | +                               | +                           | +                     | +                           | +                       | –                       | +                       | Na                      | Na                     | +                           | Na                              | Na                      |
| Palatal irregularity                         | –                              | +                               | Na                          | +                     | Na                          | Na                      | Na                      | –                       | Na                      | Na                     | Na                          | Na                              | Na                      |
| Other Skeletal anomalies                     | +                              | –                               | –                           | +                     | +                           | +                       | –                       | –                       | Na                      | –                      | +                           | Na                              | Na                      |
| <b>Short stature</b>                         | +                              | +                               | +                           | +                     | –                           | +                       | +                       | –                       | –                       | +                      | +                           | +                               | +                       |
| <b>Growth retardation</b>                    |                                |                                 |                             |                       |                             |                         |                         |                         |                         |                        |                             |                                 |                         |
| Global development delay                     | +                              | Na                              | +                           | +                     | +                           | –                       | –                       | +                       | –                       | +                      | –                           | –                               | +                       |
| Mental retardation/ learning<br>difficulties | +Mild<br>learning<br>difficult | +IQ74                           | –                           | –, IQ88               | +                           | –                       | –                       | +IQ74                   | +                       | –                      | +IQ<80                      | –                               | –                       |

|                                     |    |    |    |                                            |    |      |    |          |    |    |    |                      |                    |     |
|-------------------------------------|----|----|----|--------------------------------------------|----|------|----|----------|----|----|----|----------------------|--------------------|-----|
| Behavioural anomalies               | +  | +  | +  | Na                                         | Na | -    | -  | -        | Na | Na | +  | Na                   | Na                 | 4/7 |
| Delayed bone age                    | +  | -  | Na | +                                          | Na | +    | Na | +        | Na | +  | +  | Na                   | Na                 | 6/7 |
| <b>Neurological abnormalities</b>   |    |    |    |                                            |    |      |    |          |    |    |    |                      |                    |     |
| Epilepsy/EEG anomalies              | Na | Na | -  | EEG(+)                                     | -  | -    | -  | Na       | Na | Na | Na | Na                   | Na                 | 1/5 |
| Brain imaging anomalies             | -  | Na | -  | Na                                         | Na | Na   | Na | Na       | Na | -  | +  | Na                   | Na                 | 1/4 |
| <b>CHD</b>                          | -  | -  | +  | +                                          | Na | +    | -  | +        | Na | Na | -  | Na                   | Na                 | 4/8 |
| <b>Ocular anomalies</b>             | -  | -  | +  | +                                          | Na | +    | +  | +        | -  | Na | Na | Na                   | Na                 | 5/8 |
| <b>Cryptorchidism</b>               | +  | /  | -  | -                                          | -  | +    | /  | /        | Na | Na | -  | /                    | Na                 | 2/6 |
| <b>Hearing loss</b>                 | -  | Na | +  | +                                          | Na | +    | -  | +        | -  | Na | -  | Na                   | Na                 | 4/8 |
| <b>Kidney anomalies</b>             | Na | Na | -  | Na                                         | Na | Na   | Na | Na       | Na | Na | -  | Na                   | Na                 | 0/2 |
| <b>1st degree relative with KBG</b> | -  | -  | Na | -                                          | -  | +    | +  | +        | +  | Na | -  | Na                   | Na                 | 4/9 |
| <b>Additional features</b>          |    |    |    | 9q31.2-q33.1microdeletion, Delayed puberty |    | IUGR |    | Volvulus |    |    |    | IUGR, Hypertrichosis | precocious puberty |     |

+, Positive Phenotype; -, Negative Phenotype; NA, Data non-available; D: Deleterious; N: Neutral; B: Benign; PD: probably damaging; P: polymorphism; DC: disease causing; Na, Data non-available.
