# Supplementary material for: Genetic and Phenotypic Spectrum of KBG Syndrome: A Report of 13 New Chinese Cases and a Review of the Literature
Source: MDPI journal article supplement (doi:10.3390/jpm12030407), 2022-03-05
Supplement: s1 [file s1]

**Table S1.** Craniofacial anomalies of 13 cases in this cohort

|                                     | P1               | P2 | P3 | P4                    | P5                       | P6 | P7 | P8                 | P9 | P10                      | P11 | P12 | P13 |       |
|-------------------------------------|------------------|----|----|-----------------------|--------------------------|----|----|--------------------|----|--------------------------|-----|-----|-----|-------|
| Craniofacial anomalies              |                  |    |    |                       |                          |    |    |                    |    |                          |     |     |     | 12/12 |
| Microcephaly                        | -                | -  | +  | -                     | -                        | -  | -  | -                  | -  | -                        | -   | -   | -   | 1/13  |
| Triangular face                     | +                | -  | -  | -                     | -                        | -  | -  | -                  | -  | -                        | -   | +   | +   | 3/13  |
| Abnormality of the hairline         | -                | -  | -  | -                     | +                        | -  | +  | +                  | -  | -                        | -   | -   | -   | 3/13  |
| Highly arched eyebrow/Broad eyebrow | +, broad eyebrow | -  | -  | -                     | +                        | -  | +  | +                  | +  | +                        | -   | -   | +   | 7/13  |
| Thick eyebrow/synophrys             | -                | -  | -  | -                     | +                        | +  | +  | +                  | +  | -                        | -   | -   | -   | 6/13  |
| Thick eyelashes                     | +                | -  | -  | -                     | -                        | -  | +  | +                  | +  | -                        | -   | -   | -   | 4/13  |
| Hypertelorism                       | -                | -  | -  | -                     | +                        | -  | -  | +                  | -  | +                        | +   | -   | -   | 4/13  |
| Epicanthus                          | -                | -  | -  | -                     | +                        | -  | -  | +                  | +  | +                        | +   | -   | -   | 5/13  |
| Ptosis                              | +                | +  | +  | +                     | -                        | -  | +  | -                  | -  | -                        | -   | -   | -   | 5/13  |
| Wide nasal bridge                   | -                | +  | -  | -                     | -                        | -  | +  | +                  | -  | -                        | -   | -   | +   | 4/13  |
| Anteverted nares                    | -                | +  | -  | -                     | -                        | +  | +  | +                  | -  | -                        | -   | -   | +   | 5/13  |
| Bulbous nose                        | -                | -  | -  | -                     | -                        | -  | -  | +                  | -  | -                        | -   | -   | +   | 2/13  |
| Underdeveloped nasal alae           | -                | -  | -  | -                     | -                        | -  | -  | +                  |    | -                        | -   | -   | -   | 1/13  |
| Short columella                     | -                | -  | -  | -                     | +                        | -  | -  | -                  | -  | -                        | -   | -   | -   | 1/13  |
| Long/Smooth philtrum                | +, long philtrum | -  | -  | -                     | -                        | -  | -  | +, Smooth philtrum | +  | -                        | -   | +   | +   | 5/13  |
| Thin upper lip                      | -                | -  | -  | -                     | -                        | -  | -  | +                  | -  | -                        | -   | +   | -   | 2/13  |
| Cupid bow upper lip                 | -                | -  | -  | -                     | -                        | -  | -  | +                  | -  | -                        | -   | -   | +   | 2/13  |
| Micrognathia                        | -                | +  | -  | +                     | -                        | +  | -  | -                  | +  | -                        | -   | +   | +   | 5/13  |
| Preauricular skin tag               | +                | -  | -  | -                     | -                        | -  | -  | -                  | +  | -                        | -   | -   | -   | 1/13  |
| Preauricular pit                    | +                | -  | -  | -                     | -                        | -  | -  | +                  | -  | -                        | -   | -   | -   | 2/13  |
| Abnormal location of the ear        | -                | -  | -  | +, Auricle supination | +, Asymmetry of the ears | -  | -  | -                  | -  | +, Asymmetry of the ears | -   | -   | -   | 3/13  |

+, Positive Phenotype; -, Negative Phenotype; NA, Data non-available.
