# Supplementary material for: Genetic and Phenotypic Spectrum of KBG Syndrome: A Report of 13 New Chinese Cases and a Review of the Literature
Source: MDPI journal article supplement (doi:10.3390/jpm12030407), 2022-03-05
Supplement: s1 [file s1]

**Table S3.** Frequency of clinical phenotypes between 218 cases of truncated *ANKRD11* variation and 13 cases of missense variation

| Clinical features                                            | Truncated variation |          |          | Missense variation |          |          | <i>P</i> Value |
|--------------------------------------------------------------|---------------------|----------|----------|--------------------|----------|----------|----------------|
|                                                              | <i>n</i>            | Positive | Negative | <i>n</i>           | Positive | Negative |                |
| <b>Craniofacial anomalies</b>                                | 153                 | 153      | 0        | 12                 | 12       | 0        |                |
| <b>Dental anomalies</b>                                      | 159                 | 150      | 9        | 9                  | 8        | 1        | 0.432          |
| Macrodontia of the upper central incisors                    | 162                 | 131      | 31       | 9                  | 7        | 2        | 0.685          |
| Other tooth anomalies                                        | 95                  | 68       | 27       | 9                  | 6        | 3        | 0.715          |
| <b>Skeletal anomalies</b>                                    |                     |          |          |                    |          |          |                |
| Palatal irregularity                                         | 132                 | 46       | 86       | 5                  | 3        | 2        | 0.349          |
| Limb anomalies                                               | 162                 | 148      | 14       | 8                  | 7        | 1        | 0.530          |
| Spinal vertebral anomalies                                   | 98                  | 48       | 50       | 8                  | 5        | 3        | 0.716          |
| Bone and joint of trunk anomalies                            | 99                  | 32       | 67       | 6                  | 1        | 5        | 0.662          |
| <b>Short stature</b>                                         | 195                 | 96       | 99       | 13                 | 10       | 3        | 0.083          |
| <b>Growth retardation</b>                                    |                     |          |          |                    |          |          |                |
| (< 5 years old) Global developmental delay                   | 149                 | 138      | 11       | 12                 | 7        | 5        | 0.003          |
| (≥5 years old) Intellectual disability/learning difficulties | 174                 | 138      | 36       | 13                 | 5        | 8        | 0.003          |
| Behavioural anomalies                                        | 165                 | 118      | 47       | 8                  | 4        | 4        | 0.237          |
| Delayed bone age                                             | 95                  | 50       | 45       | 7                  | 6        | 1        | 0.125          |
| <b>Abnormality of the nervous system</b>                     |                     |          |          |                    |          |          |                |
| Brain imaging anomalies                                      | 122                 | 42       | 80       | 4                  | 1        | 3        | 1              |
| Epilepsy                                                     | 105                 | 45       | 60       | 6                  | 0        | 6        | 0.079          |
| EEG anomalies                                                | 42                  | 14       | 28       | 5                  | 1        | 4        | 1              |
| <b>Visceral system anomalies</b>                             |                     |          |          |                    |          |          |                |
| Congenital heart disease                                     | 162                 | 44       | 118      | 6                  | 3        | 3        | 0.351          |
| Renal anomalies                                              | 26                  | 12       | 14       | 2                  | 0        | 2        | 0.492          |
| <b>Gonadal anomalies</b>                                     |                     |          |          |                    |          |          |                |
| Cryptorchidism                                               | 63                  | 28       | 35       | 6                  | 2        | 4        | 0.690          |
| <b>Ocular anomalies</b>                                      | 127                 | 59       | 68       | 7                  | 5        | 2        | 0.258          |
| <b>Hearing loss</b>                                          | 167                 | 60       | 107      | 8                  | 4        | 4        | 0.466          |
